# Supplementary material for: An evaluation of the diagnostic performance characteristics of the Yellow Fever IgM immunochromatographic rapid diagnostic test kit from SD Biosensor in Ghana
Source: PLOS journal article supplement (doi:10.1371/journal.pone.0262312), 2022-01-07
Supplement: S2 (10.1371/journal.pone.0262312.s002) [file journal.pone.0262312.s002]

Supplementary information S2 Table: Panel of samples used in evaluating the YF IgM Test Kit

|         |                                                                                                                                    |
|---------|------------------------------------------------------------------------------------------------------------------------------------|
| Group 1 | 21 archived samples that tested positive by YF IgM sandwich ELISA and confirmed by PRNT or RT-PCR.                                 |
| Group 2 | 194 samples that tested negative by YF IgM sandwich ELISA but not tested by PRNT or RT-PCR irrespective of the presence of YF RNA. |
| Group 3 | 17 plasma samples collected from malaria positive children                                                                         |
| Group 4 | 7 and 5 sera derived from hepatitis B and C positive cases respectively                                                            |
| Group 5 | 2 samples that tested positive for Dengue NS1 antigen                                                                              |
| Group 6 | 60 samples from an ongoing outbreak that tested positive by YF IgM sandwich ELISA and confirmed by PRNT                            |
