# Supplementary material for: An evaluation of the diagnostic performance characteristics of the Yellow Fever IgM immunochromatographic rapid diagnostic test kit from SD Biosensor in Ghana
Source: PLOS journal article supplement (doi:10.1371/journal.pone.0262312), 2022-01-07
Supplement: S6 (10.1371/journal.pone.0262312.s006) [file journal.pone.0262312.s006]

Supplementary information S1 Text: Brief Description of Sandwich Enzyme Linked ImmunoSorbent Assay Protocol for Testing for the Presence of anti-Yellow Fever Specific IgM Antibodies

- Micro-wells were coated with 10 µl of stock goat anti human IgM (Kirkegaard and Perry Laboratories) and incubated at 4 °C overnight.
- The micro-well plate was then washed using PBS-Tween 20 (Sigma-Aldrich Co.), blocked with 10% foetal bovine serum in PBS/Tween milk and incubated for 1 hour at 37°C in a water bath.
- Test serum samples, positive and negative control sera were added after washing the wells with PBS-Tween 20.
- After a series of incubation and washing steps, substrate TMB was added and the reaction was stopped by the addition of 2M H<sub>2</sub>SO<sub>4</sub>. The optical densities of the samples were read at 450nm using a spectrophotometer.

All presumptive ELISA positive samples were confirmed by PRNT and or RT-PCR at the WHO regional laboratory in Dakar, Senegal.
